# Supplementary material for: The dynamics of linear polyubiquitin
Source: PubMed Central journal article supplement (PMC7556843; doi:10.1126/sciadv.abc3786), 2020-10-14
Supplement: abc3786_SM.pdf [file abc3786_SM.pdf]

[advances.sciencemag.org/cgi/content/full/6/42/eabc3786/DC1](https://advances.sciencemag.org/cgi/content/full/6/42/eabc3786/DC1)

## Supplementary Materials for

### **The dynamics of linear polyubiquitin**

Alexander Jussupow, Ana C. Messias, Ralf Stehle, Arie Geerlof, Sara M. Ø. Solbak, Cristina Paissoni, Anders Bach, Michael Sattler\*, Carlo Camilloni\*

\*Corresponding author. Email: [sattler@helmholtz-muenchen.de](mailto:sattler@helmholtz-muenchen.de) (M.S.), [carlo.camilloni@unimi.it](mailto:carlo.camilloni@unimi.it) (C.C.)

Published 14 October 2020, *Sci. Adv.* **6**, eabc3786 (2020)  
DOI: 10.1126/sciadv.abc3786

#### **This PDF file includes:**

Figs. S1 to S10  
Tables S1 and S2

| A                         | Scaling value   | Offset                     | Chi-Square | R <sub>g</sub> | R <sub>g</sub> with expression tag |
|---------------------------|-----------------|----------------------------|------------|----------------|------------------------------------|
| <i>Di-ubiquitin</i>       |                 |                            |            |                |                                    |
| Martini                   | 1.093 +- 0.037  | 0.036 +- 0.018             | 0.3575     | 1.654 +- 0.005 | 1.729 +- 0.004                     |
| Increased P-W interaction | 1.034 +- 0.010  | 0.151 +- 0.005             | 0.0334     | 1.933 +- 0.006 | 2.050 +- 0.006                     |
| With SAXS                 | 1.003 +- 0.001  | 0.005 +- 0.0004            | 0.0001     | 2.034 +- 0.006 | 2.230 +- 0.006                     |
|                           |                 | <i>Experimental Value:</i> |            |                | 2.23 +- 0.02                       |
| <i>Tri-ubiquitin</i>      |                 |                            |            |                |                                    |
| Increased P-W interaction | 1.042 +- 0.013  | 0.015 +- 0.023             | 0.0695     | 2.417 +- 0.013 |                                    |
| With SAXS                 | 0.990 +- 0.001  | 0.021 +- 0.001             | 0.0002     | 2.699 +- 0.013 |                                    |
|                           |                 | <i>Experimental Value:</i> |            | 2.66 +- 0.02   |                                    |
| <i>Tetra-ubiquitin</i>    |                 |                            |            |                |                                    |
| Increased P-W interaction | 1.079 +- 0.019  | 0.008 +- 0.037             | 0.1241     | 2.851 +- 0.022 |                                    |
| With SAXS                 | 0.983 +- 0.0003 | 0.032 +- 0.001             | < 0.0001   | 3.332 +- 0.018 |                                    |
|                           |                 | <i>Experimental Value:</i> |            | 3.301 +- 0.04  |                                    |

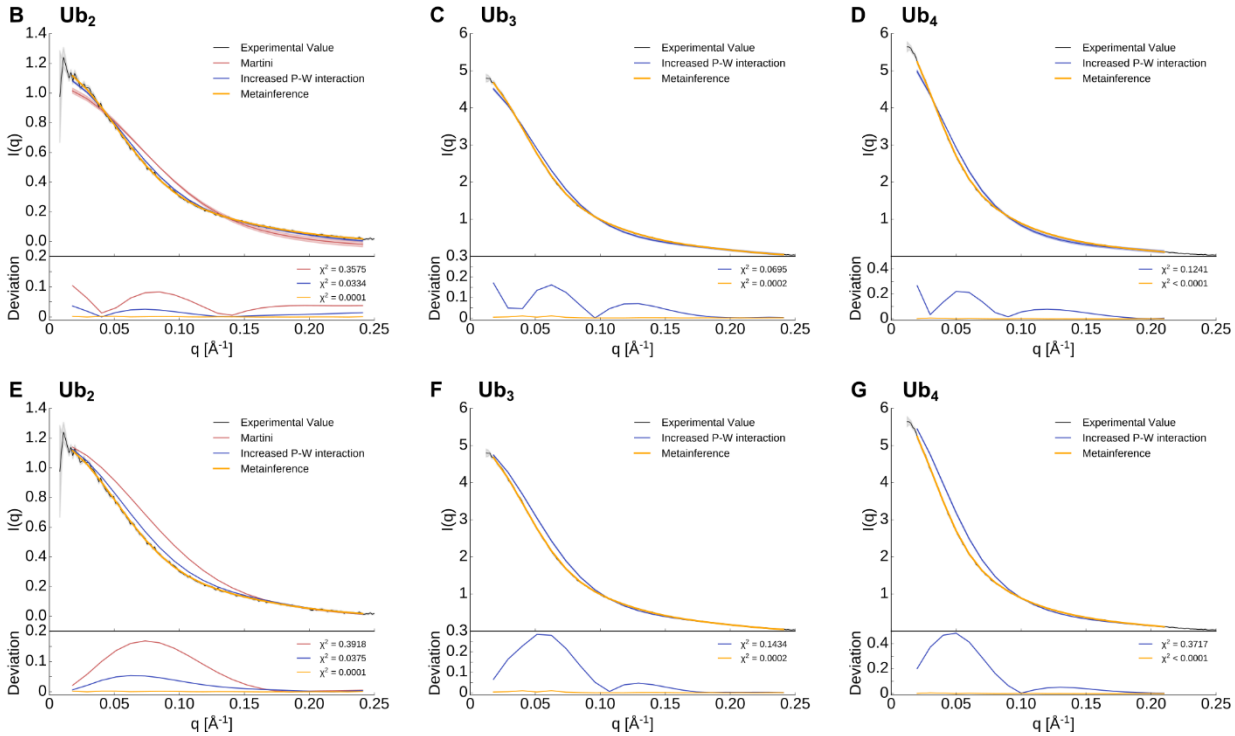

**Fig. S1. Experimental and theoretical SAXS curves of poly-ubiquitin.** **A)** Comparison of the quality of the SAXS calculations for different simulation setups. **B-D)** SAXS intensities obtained from simulations fitted to the experimental curves of Ub<sub>2</sub>, Ub<sub>3</sub>, and Ub<sub>4</sub>. **E-G)** SAXS intensities obtained from simulation with the scaling factor obtained by the M&M simulation. The scaling value should be similar for all structures and ensembles of the same protein since the

SAXS intensities for scattering vectors close to  $q = 0 \text{ \AA}^{-1}$  are mostly independent of the structure and dynamics of the system. In many cases, the SAXS curve calculated directly from a given structure or ensemble is simply fitted to the experimental data (B-D). This approach produces scaling values that are generally not transferable between different ensembles. Using the same scaling value (E-G) leads to a reduction of the agreement between theoretical and experimental SAXS profiles for non-Metainference ensembles.

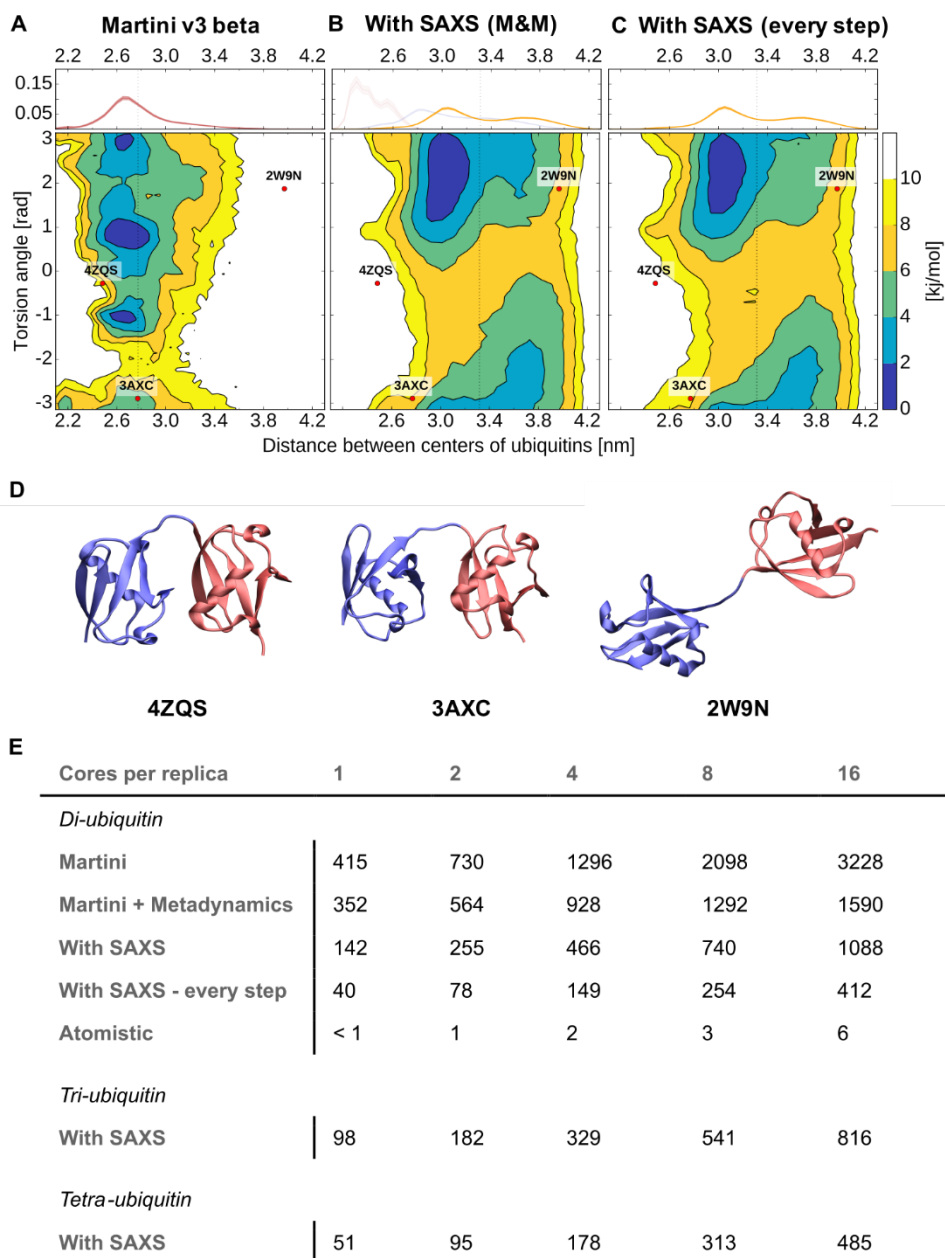

**Fig. S2. Free energy surfaces of linear di-ubiquitin for different simulation setups.** **A-C)** Free energy landscapes (in kJ/mol) as a function of the distance between the centers of the two ubiquitin domains and their relative orientation. The dots represent the coordinates associated with the available di-ubiquitin crystal structures. On top is shown the probability distribution of the distance between the centers of the two ubiquitin domains. **D)** Crystal structures of free Ub<sub>2</sub>. **E)** Performance for the different simulation setups. All values are in ns/day.

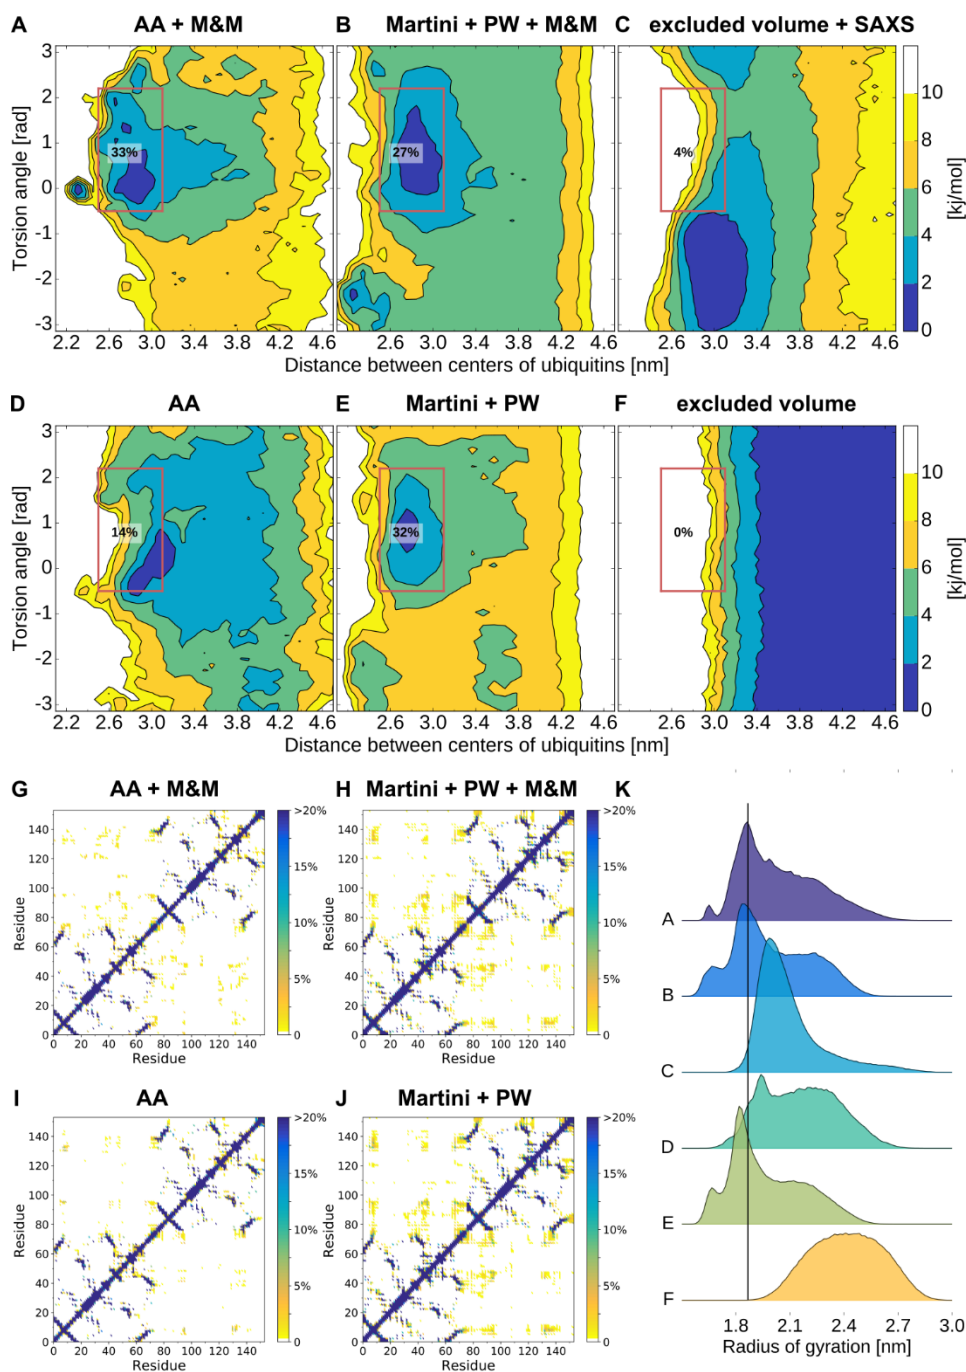

**Fig. S3. Comparison between atomistic (AA), coarse-grain (Martini) and an excluded volume ensemble for K63 Ub<sub>2</sub>.** **A-F)** Free energy landscapes (in kJ/mol) as a function of the distance between the centers of the two ubiquitin domains and their relative orientation. The value in the red box represents the amount of conformations inside the boundaries. **G-J)** Contact maps of atomistic (G,H) and coarse-grain (I,J) ensembles. **K)** Distribution of the radius of gyration from the atomistic, coarse-grain and self-avoiding ensembles with and without including of SAXS data.

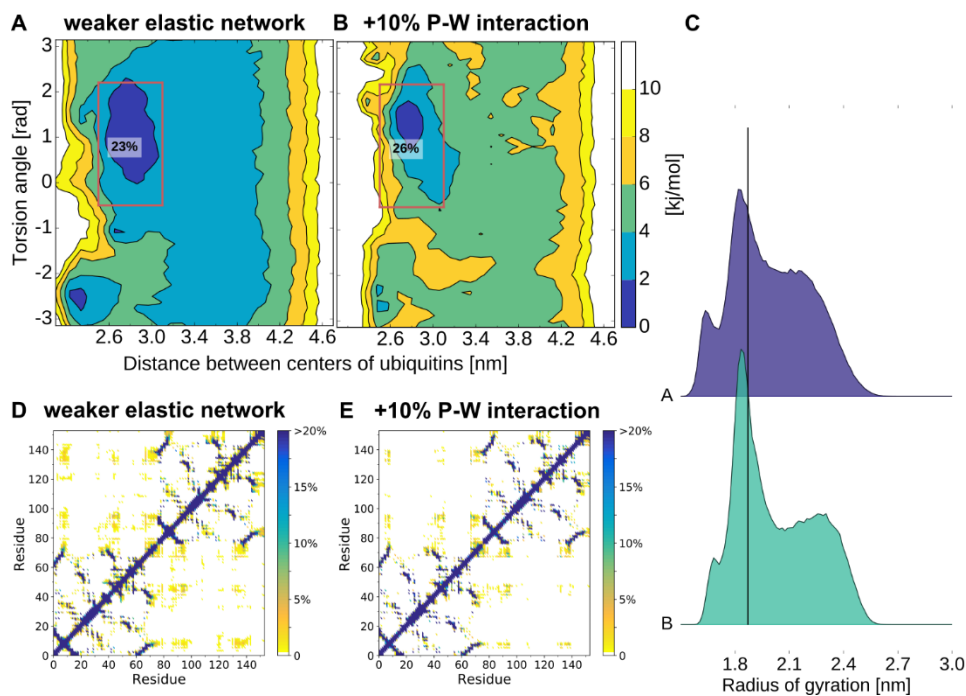

**Fig. S4. Effect of weaker elastic network and +10% increased protein-water (P-W) interaction on the K63 Ub<sub>2</sub> ensemble.** **A-B)** Free energy landscapes (in kJ/mol) as a function of the distance between the centers of the two ubiquitin domains and their relative orientation. The value in the red box represents the amount of conformations inside the boundaries. **C)** Distribution of the radius of gyration from the ensemble with weaker elastic network and +10% increased protein water interaction. **D-E)** Contact maps of ensembles with weaker elastic network (D) and +10% increased protein water interaction (E).

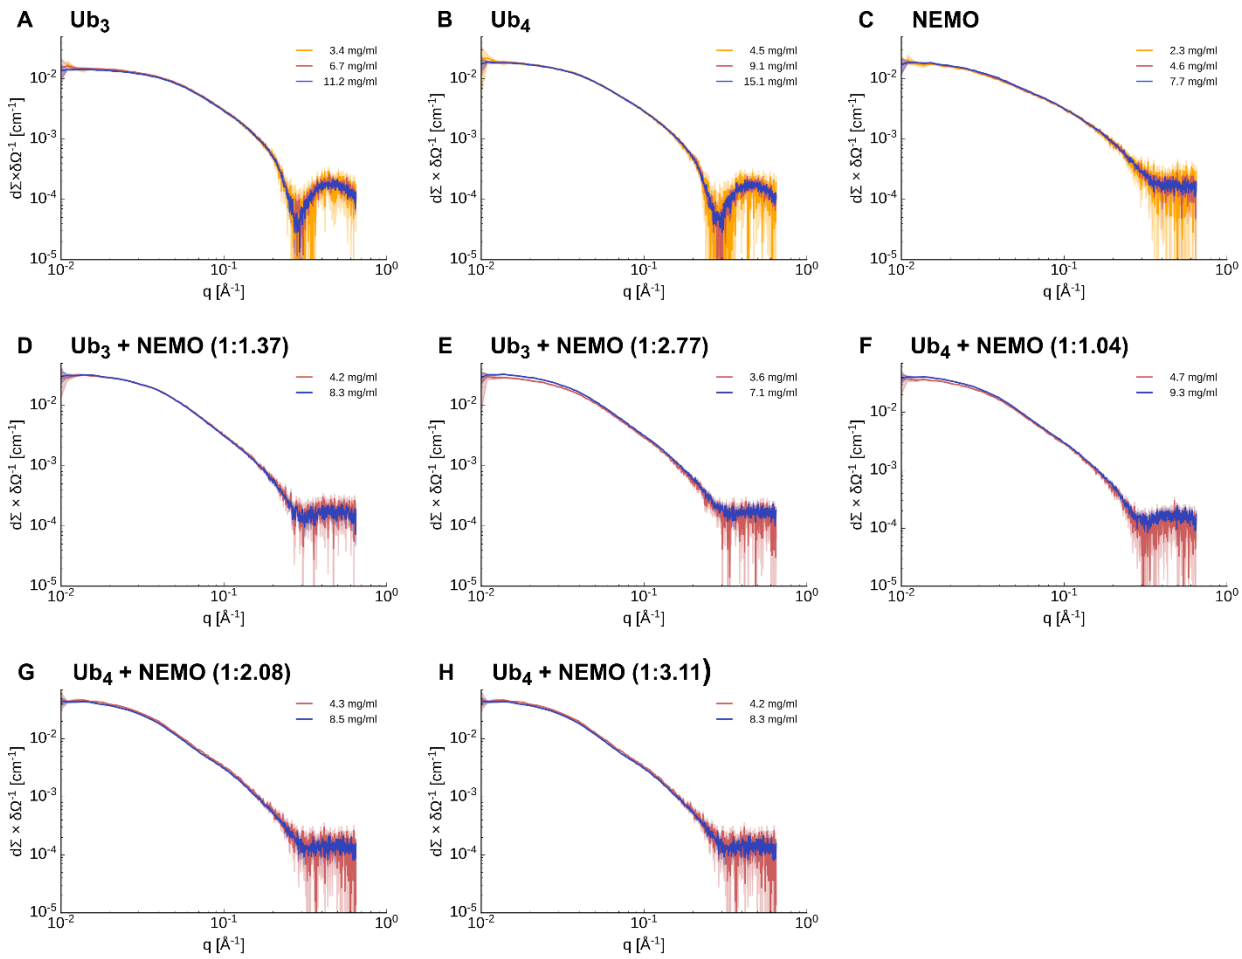

| I               |       |           |              |           |                      | J                    |        |           |              |           |                      |
|-----------------|-------|-----------|--------------|-----------|----------------------|----------------------|--------|-----------|--------------|-----------|----------------------|
| System          | ratio | c (mg/ml) | corrected c* | NEMO / uM | Ub <sub>x</sub> / uM | System               | ratio  | c (mg/ml) | corrected c* | NEMO / uM | Ub <sub>x</sub> / uM |
| NEMO            | 7.72  |           | 702.5        |           |                      | NEMO:Ub <sub>3</sub> | 1.37:1 | 8.29      |              | 279.4     | 203.5                |
| NEMO            | 4.62  |           | 420.4        |           |                      | NEMO:Ub <sub>3</sub> | 1.37:1 | 4.19      |              | 141.0     | 102.8                |
| NEMO            | 2.34  |           | 212.9        |           |                      | NEMO:Ub <sub>3</sub> | 2.77:1 | 7.12      |              | 351.2     | 126.9                |
|                 |       |           |              |           |                      | NEMO:Ub <sub>3</sub> | 2.72:1 | 3.59      |              | 175.6     | 64.5                 |
| Ub <sub>3</sub> | 11.17 |           |              |           | 435.2                |                      |        |           |              |           |                      |
| Ub <sub>3</sub> | 6.72  |           |              |           | 261.9                | NEMO:Ub <sub>4</sub> | 1.04:1 | 7.01      | 9.25         | 210.2     | 202.9                |
| Ub <sub>3</sub> | 3.41  |           |              |           | 133.0                | NEMO:Ub <sub>4</sub> | 1.04:1 | 3.54      | 4.67         | 106.4     | 102.2                |
|                 |       |           |              |           |                      | NEMO:Ub <sub>4</sub> | 2.08:1 | 6.83      | 8.48         | 308.7     | 148.6                |
| Ub <sub>4</sub> | 10.2  | 15.1      |              |           | 441                  | NEMO:Ub <sub>4</sub> | 2.06:1 | 3.04      | 4.27         | 154.3     | 75.1                 |
| Ub <sub>4</sub> | 6.14  | 9.1       |              |           | 265                  | NEMO:Ub <sub>4</sub> | 3.11:1 | 6.97      | 8.30         | 377.8     | 121.4                |
| Ub <sub>4</sub> | 3.59  | 4.5       |              |           | 131                  | NEMO:Ub <sub>4</sub> | 3.11:1 | 3.48      | 4.15         | 188.9     | 60.7                 |

**Fig. S5. Experimental SAXS curves with different protein concentrations.** A) Linear Ub<sub>3</sub> B) linear Ub<sub>4</sub> C) NEMO D) Ub<sub>3</sub> with NEMO in a 1:1.37 ratio E) Ub<sub>3</sub> with NEMO in a 1:2.77 ratio F) Ub<sub>4</sub> with NEMO in a 1:1.04 ratio G) Ub<sub>4</sub> with NEMO in a 1:2.08 ratio H) Ub<sub>4</sub> with NEMO in a 1:3.11 ratio I-J) Concentrations of substrates used for SAXS measurements. Protein concentration (c) was determined by measuring the absorbance at 205 nm using specific absorbance for NEMO<sub>258-350</sub> C347S of 300990 M<sup>-1</sup> cm<sup>-1</sup>. \*The concentration of Ub<sub>4</sub> was corrected based on SEC-SLS.

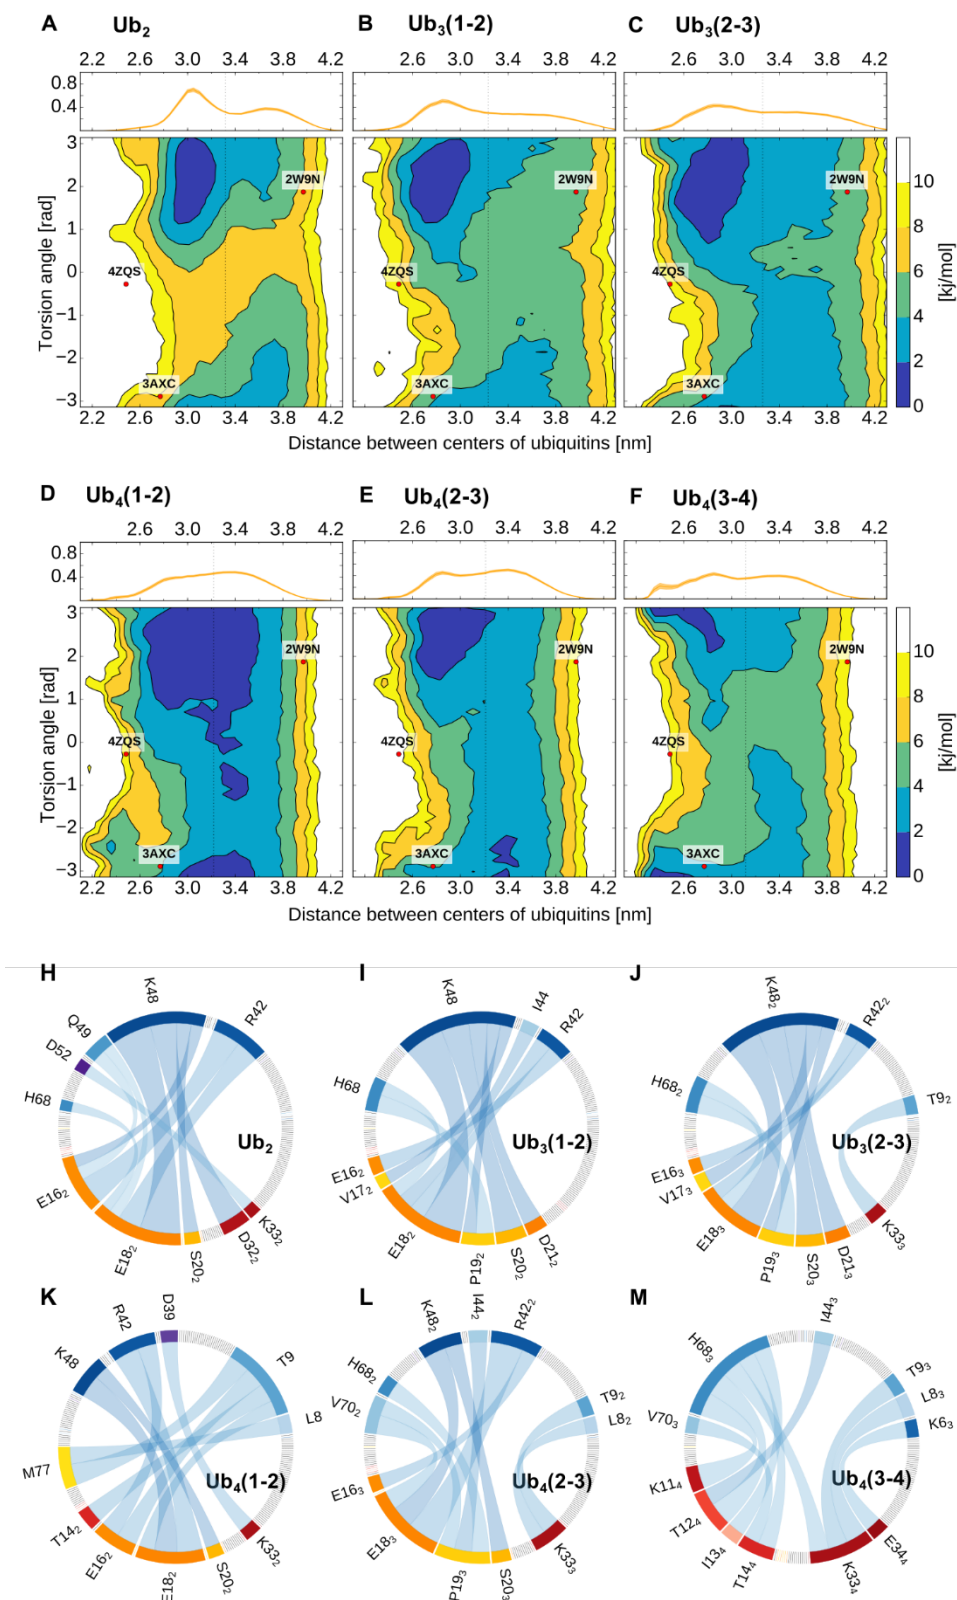

**Fig. S6. Interactions between all neighboring ubiquitin pairs of Ub<sub>2</sub>, Ub<sub>3</sub>, and Ub<sub>4</sub>.** **A-F)** Free energy landscapes (in kJ/mol) as a function of the distance between the centers of the two ubiquitin domains and their relative orientation. The dots represent the coordinates associated with the available di-ubiquitin crystal structures. On top is shown the probability distribution of the distance between the centers of the two ubiquitin domains. **H-M)** Chord diagram of the



ten most common contacts between two close-by ubiquitins. The edge colors are corresponding to the colors of the interaction surfaces shown in **Figure 4d**. The thickness of the edge-edge connection is correlated to the probability of finding this specific interaction (thicker = more likely). The transparency of the connections depends on the type of interaction Low, intermediate or high transparency is related to charged, polar or hydrophobic interactions.

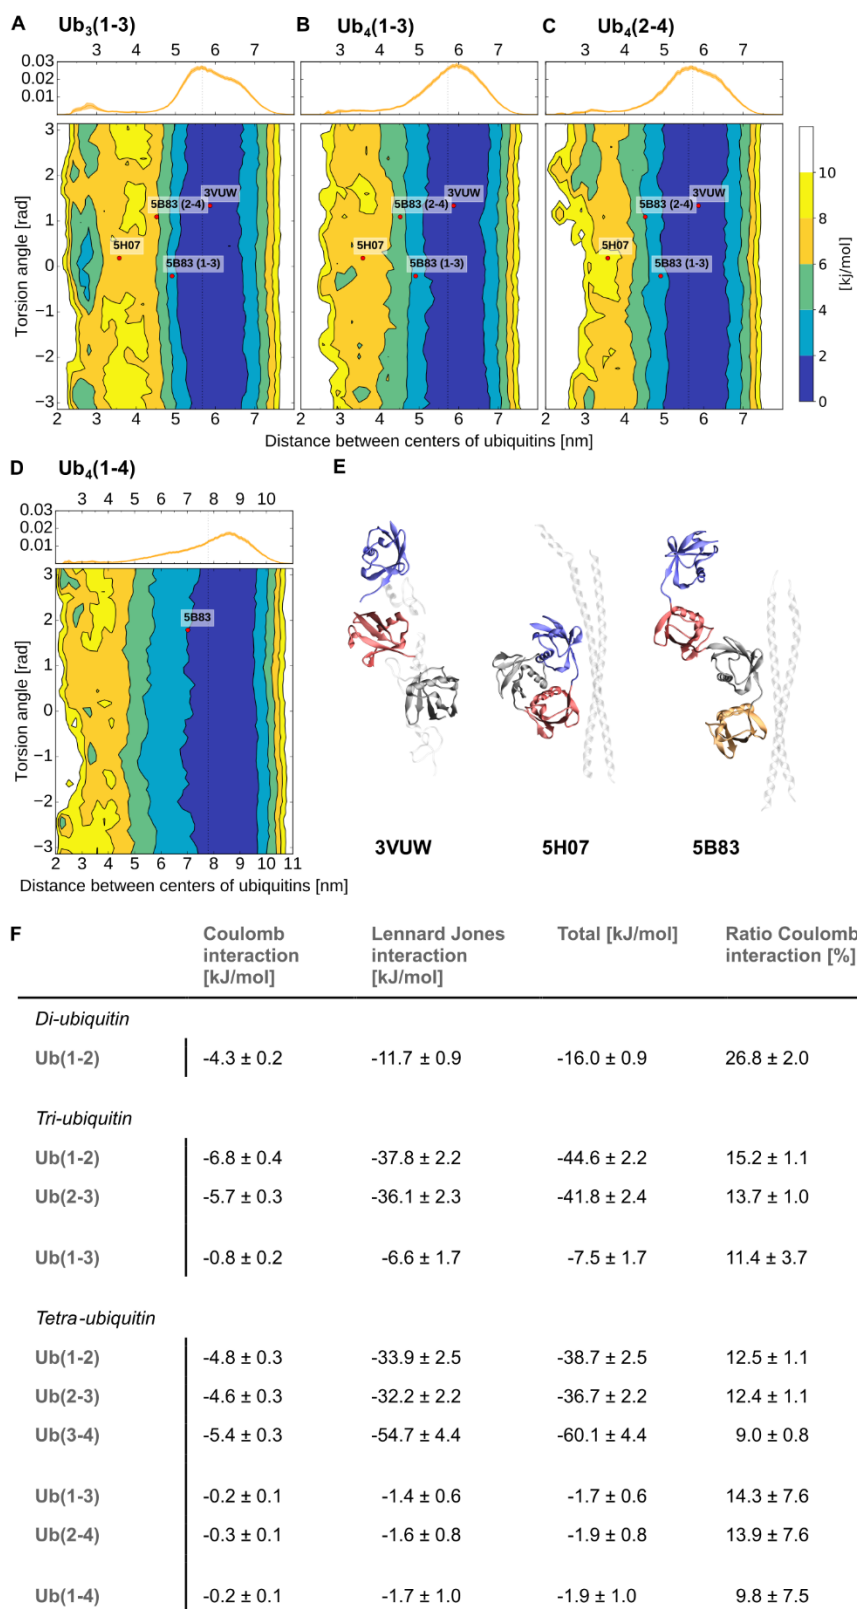

**Fig. S7. Free energy surfaces for all non-neighboring ubiquitin pairs of Ub<sub>3</sub> and Ub<sub>4</sub>.** A-D) Free energy landscapes (in kJ/mol) as a function of the distance between the centers of the two ubiquitin domains and their relative orientation. The dots represent the coordinates associated with the available di-ubiquitin crystal structures. On top is shown the

probability distribution of the distance between the centers of the two ubiquitin domains. **E)** Crystal structures of linear Ub<sub>3</sub> and Ub<sub>4</sub> in a bound conformation (3VUW, 5H07, 5B83). **F)** Decomposition of the average interaction energy between ubiquitin pairs (residue 2-70).

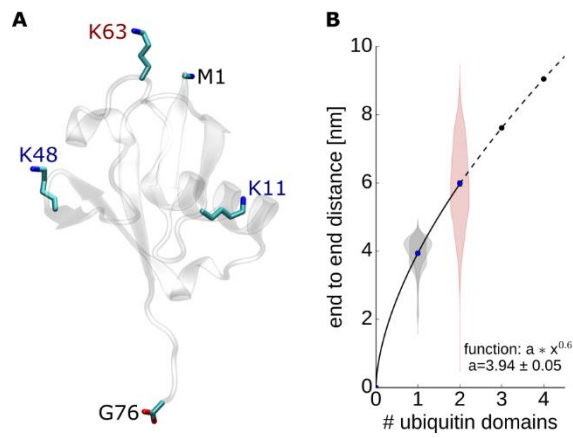

**Fig. S8. End to end distances in ubiquitin.** **A)** Start and end residues in the ubiquitin crystal structure. K63 side chain is further away from G76 than M1 backbone. K48 and K11 are closer to G76. **B)** Average end to end (e2e) distance of K63 poly-ubiquitin chain. The end to end (e2e) distance of N=1 was determined as the average e2e distance of the proximal and distal ubiquitin in K63 di-ubiquitin.

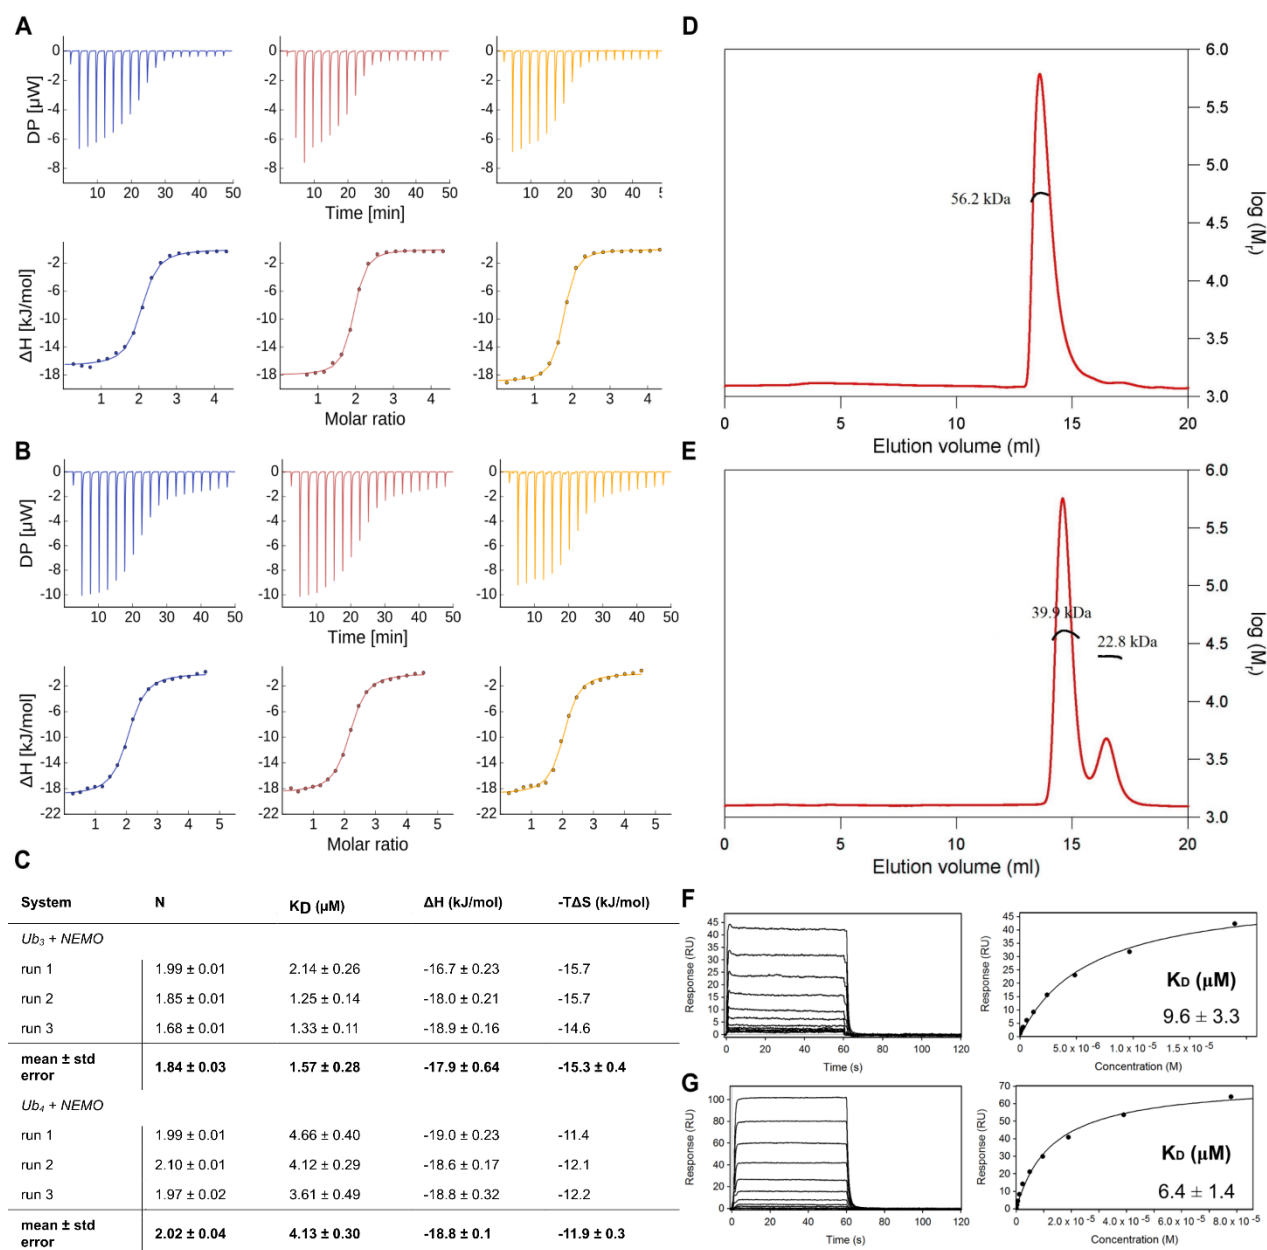

**Fig. S9. ITC, SEC+SLS and SPR experiments. A-B)** Isothermal titration calorimetry (ITC) measurement of the interaction of NEMO<sub>258-350</sub> with Ub<sub>3</sub> (A) and Ub<sub>4</sub> (B). **C)** Thermodynamic properties obtained by ITC with N for stoichiometry,  $K_D$  for dissociation constant,  $\Delta H$  for enthalpy change and  $-T\Delta S$  for entropy change. **D-E)** Determination of the molecular weight of NEMO:Ub<sub>3</sub> (D) and NEMO:Ub<sub>4</sub> (E) complexes using size exclusion chromatography (SEC) in combination with static light scattering (SLS). The refractive index (red) and right-angle light scattering (not shown) signals were monitored and used to determine the molecular weights (black). The NEMO-Ub<sub>3</sub> sample elutes in two peaks. The first peak elutes at 14.6 ml and a molecular weight (MW) of 39.9 kDa containing a mixture of the NEMO:Ub<sub>3</sub> complex and free NEMO dimer. The second peak elutes at 16.5 ml and contained the remaining Ub<sub>3</sub> (MW of 24.6 kDa). The NEMO:Ub<sub>4</sub> complex eluted in one major peak at 13.6 ml and a MW of 56.2 kDa indicating that

indeed a 2:1 complex is formed. **F-G**) SPR sensorgrams of NEMO interacting with immobilized Ub<sub>3</sub> or Ub<sub>4</sub>. NEMO was injected in two-fold serial dilution ranging from 0.9 –19 μM over immobilized Ub<sub>3</sub> (456 RU) (F) and Ub<sub>4</sub> (721 RU) (G) (Left panels). Sensorgrams are blank injection and reference surface subtracted. An activated and inactivated blank surface was used as a reference. Right panels display plots of equilibrium binding responses at the end of the analyte injections from sensorgrams in left panels against analyte concentration. Steady state equilibrium dissociation constants ( $K_D$ ) is fitted from curves and a 1:1 model.

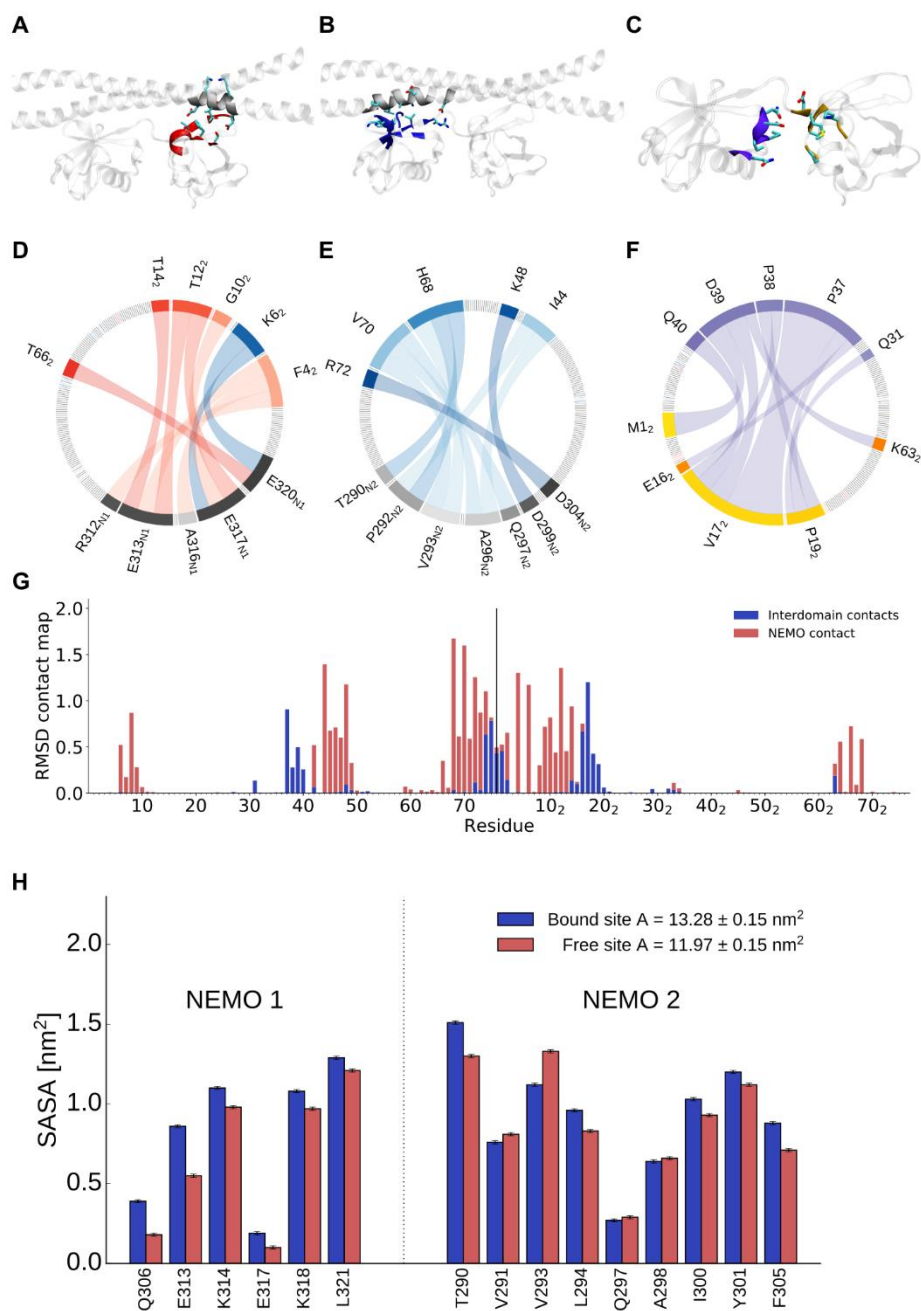

**Fig. S10. Intramolecular interactions of di-ubiquitin and NEMO.** **A-B)** Interaction surfaces of Ub<sub>2</sub> and NEMO 1 (A) and of Ub<sub>2</sub> and NEMO 2 (B). The red and blue surface is similar to the blue area marked in **Figure 4d**. **C)** Interaction surface of two neighboring ubiquitins. **D-F)** Chord diagram of the ten most common contacts between NEMO 1 (D) and Ub<sub>2</sub>, NEMO 2 and Ub<sub>2</sub> (E), and both ubiquitin cores (F). The edge colors are corresponding to the colors of the interaction surfaces shown in A-C. **G)** Contact map differences between free and NEMO-bound Ub<sub>2</sub>. **H)** Solvent accessible surface area (SASA) changes in NEMO dimer upon binding to Ub<sub>2</sub>. The bars show the SASA per residue, averaged over the conformational ensemble, for the residues involved in the binding with Ub<sub>2</sub>. Blue bars are for the two NEMO monomers in the ubiquitin bound state, while the red bars are for the free state. On top is reported the SASA for all the considered residues.

**Table S1. Overview of all simulations.**

| System                                              | Total number of beads | Metadynamics | Metainference (SAXS) | Number of beads for SAXS calculation | Number of replicas | Total Simulation length [ $\mu$ s] ( simulation length per replica [ns] ) |
|-----------------------------------------------------|-----------------------|--------------|----------------------|--------------------------------------|--------------------|---------------------------------------------------------------------------|
| <i>Di-ubiquitin</i>                                 |                       |              |                      |                                      |                    |                                                                           |
| <b>Martini 2.2</b>                                  | 13569                 | x            |                      |                                      | 112                | 48 (428)                                                                  |
| <b>Increased P-W interaction</b>                    | 13569                 | x            |                      |                                      | 112                | 69 (616)                                                                  |
| <b>With SAXS</b>                                    | 13569                 | x            | x                    | 355                                  | 112                | 65 (581)                                                                  |
| <b>With SAXS(every time step)</b>                   | 13569                 | x            | x                    | 355                                  | 112                | 58 (517)                                                                  |
| <b>Martini 3 beta</b>                               | 13569                 |              |                      |                                      | 112                | 242 (2160)                                                                |
| <i>Tri-ubiquitin</i>                                |                       |              |                      |                                      |                    |                                                                           |
| <b>Increased P-W interaction</b>                    | 12501                 | x            |                      |                                      | 112                | 99 (884)                                                                  |
| <b>With SAXS</b>                                    | 12501                 | x            | x                    | 489                                  | 112                | 60 (536)                                                                  |
| <i>Tetra-ubiquitin</i>                              |                       |              |                      |                                      |                    |                                                                           |
| <b>Increased P-W interaction</b>                    | 15445                 | x            |                      | 652                                  | 112                | 60 (536)                                                                  |
| <b>With SAXS</b>                                    | 15445                 | x            | x                    | 652                                  | 112                | 63 (562)                                                                  |
| <i>Nemo</i>                                         |                       |              |                      |                                      |                    |                                                                           |
| <b>With SAXS</b>                                    | 33698                 | x            | x                    | 400                                  | 64                 | 8 (125)                                                                   |
| <i>K63 Ub<sub>2</sub></i>                           |                       |              |                      |                                      |                    |                                                                           |
| <b>Increased P-W interaction</b>                    | 13151                 | x            |                      |                                      | 112                | 72 (641)                                                                  |
| <b>With SAXS</b>                                    | 13151                 | x            | x                    | 328                                  | 112                | 62 (554)                                                                  |
| <b>With SAXS and weaker elastic network</b>         | 13151                 | x            | x                    | 328                                  | 112                | 73 (651)                                                                  |
| <b>With SAXS and +10% increased P-W interaction</b> | 13151                 | x            | x                    | 328                                  | 112                | 64 (572)                                                                  |
| <b>Excluded volume</b>                              | 328                   |              |                      |                                      | 112                | 19 (173)                                                                  |
| <b>Excluded volume + SAXS</b>                       | 328                   |              | x                    | 328                                  | 112                | 11 (102)                                                                  |



**Table S2. Determination of the molecular weight of NEMO, Ub<sub>3</sub>, Ub<sub>4</sub>, NEMO-Ub<sub>3</sub> and NEMO-Ub<sub>4</sub> using size exclusion chromatography (SEC) in combination with static light scattering (SLS).** Apart from indicated with “#” the conditions were 50 mM Tris.HCl pH 8, 300 mM NaCl. # 50 mM sodium phosphate pH 7, 50 mM NaCl (ITC conditions). \* Peaks are not fully separated. Peak of complex “integrated”.

| Protein                           | Peak 1 / ml<br>(MWexp / kDa) | Peak 2 / mL<br>(MWexp / kDa) | MWcalc /kDa       | Remarks                |
|-----------------------------------|------------------------------|------------------------------|-------------------|------------------------|
| <b>NEMO dimer</b>                 | 15.5 (20.6)                  | -                            | <b>22.0</b>       | -                      |
| <b>Ub<sub>3</sub></b>             | 16.6 (24.1)                  | -                            | <b>25.7</b>       | -                      |
| <b>Ub<sub>4</sub></b>             | 15.9 (32.3)                  | -                            | <b>34.2</b>       | -                      |
| <b>NEMO:Ub<sub>3</sub> 1.4:1</b>  | 14.6 (39.9)<br>(45.0)*       | 16.5 (24.6)                  | <b>47.7 (2:1)</b> | Excess Ub <sub>3</sub> |
| <b>NEMO:Ub<sub>3</sub> 2:1</b>    | 14.7 (41.1)                  | 17.0 (22.8)                  | <b>47.7 (2:1)</b> | Free Ub <sub>3</sub>   |
| <b>NEMO:Ub<sub>3</sub> 2:1#</b>   | 14.2 (42.2)                  | -                            | <b>47.7 (2:1)</b> | -                      |
| <b>NEMO:Ub<sub>3</sub> 4:1</b>    | 14.6 (40.8)                  | 15.3 (24.1)                  | <b>69.6 (4:1)</b> | Excess NEMO            |
| <b>NEMO:Ub<sub>4</sub> 1.0:1</b>  | 13.7 (53.0)                  | 15.8 (32.7)                  | <b>56.2 (2:1)</b> | Excess Ub <sub>4</sub> |
| <b>NEMO:Ub<sub>4</sub> 2.0:1</b>  | 13.6 (56.2)                  | -                            | <b>56.2 (2:1)</b> | No extra peaks.        |
| <b>NEMO:Ub<sub>4</sub> 4.1:1</b>  | 13.6 (53.2)                  | 15.2 (21.3)                  | <b>78.2 (4:1)</b> | Excess NEMO            |
| <b>NEMO:Ub<sub>4</sub> 2.5:1#</b> | 13.1 (53.4)                  | 14.6 (16.5)                  | <b>78.2 (4:1)</b> | Excess NEMO            |
